# Supplementary material for: Enhanced Photocatalytic Degradation of Methylene Blue Using Ti-Doped ZnO Nanoparticles Synthesized by Rapid Combustion
Source: MDPI journal article supplement (doi:10.3390/toxics11010033), 2022-12-29
Supplement: s1 [file s1]

# Enhanced Photocatalytic Degradation of Methylene Blue Using Ti-Doped ZnO Nanoparticles Synthesized by Rapid Combustion

Sutthipoj Wongrerkdee, Sawitree Wongrerkdee, Chatdanai Boonruang, Supphadate Sujinnapram

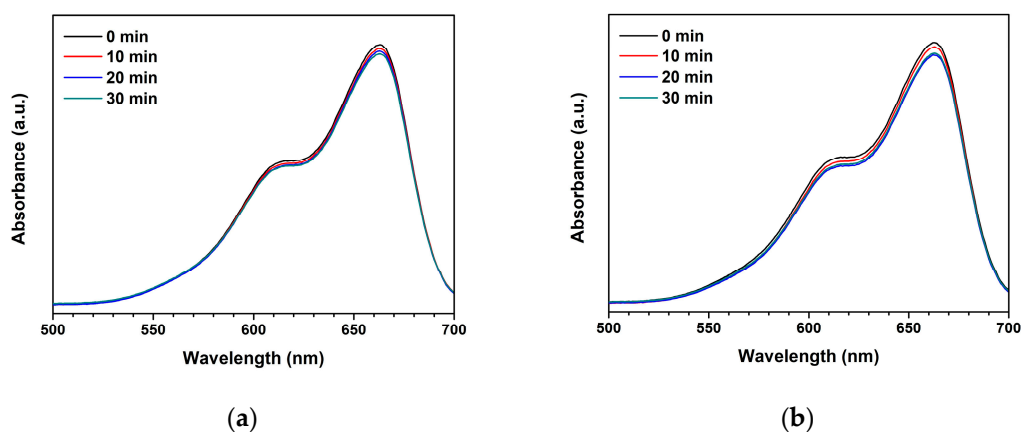

**Figure S1.** Absorbances of MB in the dark condition with the dispersion of (a) ZnO and (b) Ti-ZnO photocatalysts.
